# Supplementary material
Source: publisher site journal article supplement (https://www.dovepress.com/article/509022)
Supplement: Supplementary file 1 [file get_supplementary_file.php]

**Supplemental Table 1.** Association between mechanical ventilation use and inpatient palliative care in COPD patients: overall and subgroup analysis

|  | No MV | | MV | | Crude OR  (95% CI) | *p-*value | AOR  (95% CI) | *p-*value |
| --- | --- | --- | --- | --- | --- | --- | --- | --- |
| MV vs. No MV | N | PC | N | PC |  |  |  |  |
| Overall | 20730 | 4321(20.84) | 16118 | 1275(7.91) | 0.33(0.31-0.35) | <0.0001 | 0.40(0.37-0.43) | <0.0001 |
| Stratified |  |  |  |  |  |  |  |  |
| Gender |  |  |  |  |  |  |  |  |
| Male | 15135 | 3496(23.1) | 12236 | 1048(8.56) | 0.31(0.29-0.34) | <0.0001 | 0.41(0.37-0.44) | <0.0001 |
| Female | 5595 | 825(14.75) | 3882 | 227(5.85) | 0.36(0.31-0.42) | <0.0001 | 0.38(0.32-0.45) | <0.0001 |
| Age of COPD |  |  |  |  |  |  |  |  |
| <65 | 1833 | 671(36.61) | 1596 | 192(12.03) | 0.24(0.20-0.28) | <0.0001 | 0.30(0.23-0.38) | <0.0001 |
| 65-74 | 2836 | 896(31.59) | 2641 | 287(10.87) | 0.26(0.23-0.31) | <0.0001 | 0.35(0.29-0.42) | <0.0001 |
| 75-84 | 6350 | 1339(21.09) | 5515 | 403(7.31) | 0.30(0.26-0.33) | <0.0001 | 0.39(0.34-0.45) | <0.0001 |
| >=85 | 9711 | 1415(14.57) | 6366 | 393(6.17) | 0.39(0.34-0.43) | <0.0001 | 0.49(0.43-0.56) | <0.0001 |
| CCI group |  |  |  |  |  |  |  |  |
| 0 | 5712 | 126(2.21) | 4384 | 52(1.19) | 0.53(0.38-0.74) | 0.0001 | 0.38(0.27-0.54) | <0.0001 |
| 1-2 | 5735 | 871(15.19) | 4936 | 331(6.71) | 0.40(0.35-0.46) | <0.0001 | 0.55(0.47-0.64) | <0.0001 |
| >=3 | 9283 | 3324(35.81) | 6798 | 892(13.12) | 0.27(0.25-0.29) | <0.0001 | 0.36(0.32-0.40) | <0.0001 |
| Comorbidity |  |  |  |  |  |  |  |  |
| Heart Failure | 3998 | 747(18.68) | 4044 | 332(8.21) | 0.39(0.34-0.45) | <0.0001 | 0.45(0.38-0.53) | <0.0001 |
| Ischemic Heart Disease | 3115 | 659(21.16) | 2975 | 273(9.18) | 0.38(0.32-0.44) | <0.0001 | 0.44(0.37-0.53) | <0.0001 |
| Atrial Fibrillation | 1865 | 379(20.32) | 1851 | 171(9.24) | 0.40(0.33-0.48) | <0.0001 | 0.47(0.37-0.59) | <0.0001 |
| Dementia | 3218 | 511(15.88) | 2011 | 166(8.25) | 0.48(0.40-0.57) | <0.0001 | 0.55(0.45-0.68) | <0.0001 |
| Pneumonia | 10499 | 2470(23.53) | 9675 | 867(8.96) | 0.32(0.29-0.35) | <0.0001 | 0.44(0.40-0.48) | <0.0001 |
| Sepsis | 6892 | 1350(19.59) | 6418 | 464(7.23) | 0.32(0.29-0.36) | <0.0001 | 0.39(0.34-0.45) | <0.0001 |
| Cancer | 6328 | 2721(43.00) | 3991 | 609(15.26) | 0.24(0.22-0.26) | <0.0001 | 0.30(0.26-0.34) | <0.0001 |
| Hospital level |  |  |  |  |  |  |  |  |
| Medical centers | 4017 | 1602(39.88) | 3686 | 585(15.87) | 0.28(0.26-0.32) | <0.0001 | 0.39(0.34-0.45) | <0.0001 |
| Regional hospitals | 8529 | 2168(25.42) | 7389 | 551(7.46) | 0.24(0.21-0.26) | <0.0001 | 0.37(0.33-0.41) | <0.0001 |
| District Hospital | 8184 | 551(6.73) | 5043 | 139(2.76) | 0.39(0.33-0.48) | <0.0001 | 0.48(0.39-0.59) | <0.0001 |
| Health care utilization |  |  |  |  |  |  |  |  |
| One-year ER visits |  |  |  |  |  |  |  |  |
| 0 | 11481 | 1925(16.77) | 7110 | 416(5.85) | 0.31(0.28-0.35) | <0.0001 | 0.41(0.35-0.47) | <0.0001 |
| 1-3 | 2648 | 687(25.94) | 2424 | 244(10.07) | 0.32(0.27-0.37) | <0.0001 | 0.39(0.32-0.47) | <0.0001 |
| >3 | 6601 | 1709(25.89) | 6584 | 615(9.34) | 0.30(0.27-0.33) | <0.0001 | 0.40(0.36-0.45) | <0.0001 |
| ICU |  |  |  |  |  |  |  |  |
| No | 17727 | 4047(22.83) | 8777 | 797(9.08) | 0.34(0.31-0.37) | <0.0001 | 0.38(0.35-0.42) | <0.0001 |
| Yes | 3003 | 274(9.12) | 7341 | 478(6.51) | 0.69(0.59-0.81) | <0.0001 | 0.45(0.38-0.54) | <0.0001 |
| Length of stay, days |  |  |  |  |  |  |  |  |
| 0 | 8401 | 1692(20.14) | 4755 | 363(7.63) | 0.33(0.29-0.37) | <0.0001 | 0.47(0.40-0.55) | <0.0001 |
| <=30 | 4010 | 976(24.34) | 2622 | 216(8.24) | 0.28(0.24-0.33) | <0.0001 | 0.33(0.28-0.40) | <0.0001 |
| 31-120 | 5906 | 1346(22.79) | 5107 | 464(9.09) | 0.34(0.30-0.38) | <0.0001 | 0.36(0.31-0.41) | <0.0001 |
| >120 | 2413 | 307(12.72) | 3634 | 232(6.38) | 0.47(0.39-0.56) | <0.0001 | 0.51(0.41-0.64) | <0.0001 |
